# Supplementary material
Source: Springer Nature journal article supplement (https://www.springermedizin.de/resource/supplementary/12911_2013_791_MOESM2_ESM.pdf/9526660)

Histogram of Residuals

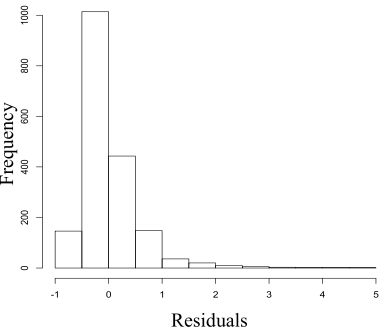

Residual vs Fitted

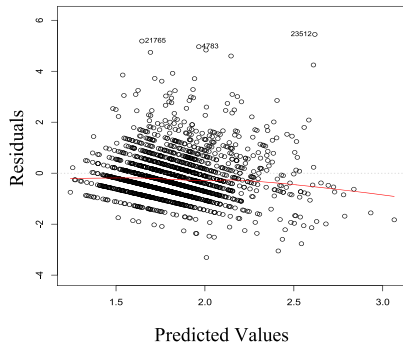

Normal Q-Q

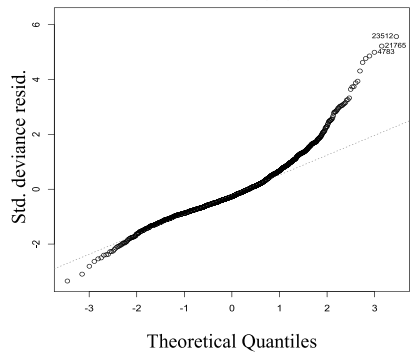

Scale-Location

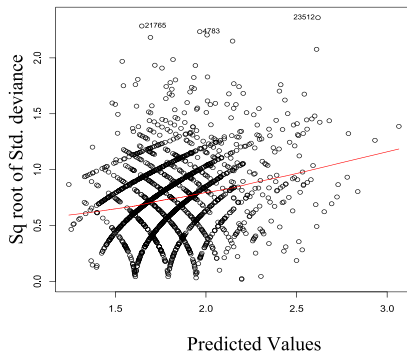

Residuals vs Leverage

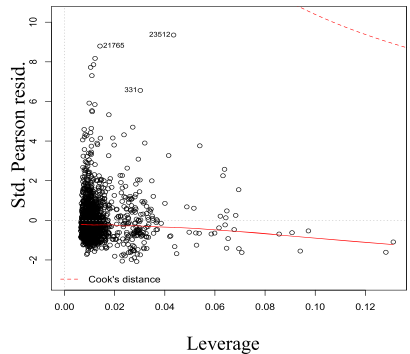

Supplement: MOESM2 [file 9526660]
